1                   **A natural fungal gene drive enacts killing through targeting DNA**

2

3   Andrew S. Urquhart<sup>1,2\*</sup> and Donald M. Gardiner<sup>1,3</sup>

4           1. Commonwealth Scientific and Industrial Research Organisation, St Lucia, Queensland,  
5           Australia

6           2. Applied Biosciences, Macquarie University, Macquarie Park, New South Wales, Australia

7           3. The University of Queensland, St Lucia, Queensland, Australia

8   \*Corresponding author: Andrew.Urquhart@csiro.au

9   Keywords: Gene drive, spore killer, mechanism, fungi, nuclease, DNA

10

## 1 Abstract

2 Fungal spore-killers are a class of selfish genetic elements that positively bias their own inheritance  
3 by killing non-inheriting gametes following meiosis. As killing takes place specifically within the  
4 developing fungal ascus, a tissue which is experimentally difficult to isolate, our understanding of the  
5 mechanisms underlying spore killers are limited. In particular, how these loci kill other spores within  
6 the fungal ascus is largely unknown. Here we overcome these experimental barriers by developing  
7 model systems in two evolutionary distant organisms, *Escherichia coli* (bacterium) and  
8 *Saccharomyces cerevisiae* (yeast). Using these systems, we show that the *Podospora anserina* spore  
9 killer protein Spok1 enacts killing through targeting DNA.

10

## 11 Significance Statement

12 Natural gene drives have shaped the genomes of many eukaryotes and recently have been  
13 considered for applications to control undesirable species. In fungi these loci are called spore-killers.  
14 Despite their importance in evolutionary processes and possible applications our understanding of  
15 how they enact killing is limited. We show that the spore killer protein Spok1, which has homologues  
16 throughout the fungal tree of life, acts via DNA disruption. Spok1 is only the second spore killer locus  
17 in which the cellular target of killing has been identified and is the first known to target DNA. We  
18 also show that the DNA disrupting activity of Spok1 is functional in both bacteria and yeast  
19 suggesting a highly conserved mode of action.

20

## 21 Introduction

22 Gene drives are genetic elements that positively distort the frequency in which they are inherited.  
23 One group of meiotic gene drives are the evolutionarily diverse spore killer proteins found in  
24 ascomycete fungi. These gene drives distort normal mendelian inheritance by killing sibling progeny  
25 that do not inherit the locus [1]. Spore killers include het-s and Spok in *Podospora anserina* [2, 3]; Sk-  
26 1 and Sk-2 in *Neurospora* [4, 5], and *wtf* genes in *Schizosaccharomyces pombe* [6, 7].

27 Understanding how these gene drives function is important. Firstly, they likely influence genome  
28 evolution and structure, including mobile elements [8]. Secondly, uncovering their mechanisms  
29 might provide insight into conserved biological processes that they disrupt to enact killing [1]. And  
30 thirdly, they are potentially useful in pathogen control strategies. Gene drive approaches have  
31 already been widely investigated as control strategies for insect pests, notably malaria-transmitting  
32 mosquitoes [9]. The Spok1 spore killer from *Podospora anserina* has been shown to function  
33 heterologously in the dung-colonising fungus *Sordaria macrospora* [3] and the plant pathogen  
34 *Fusarium graminearum* [10]. The genetic control of plant-pathogenic fungi would decrease the need  
35 for the environmentally damaging fungicides currently used in agriculture.

36 Gene drive elements show considerable diversity. For example, the *Neurospora* Sk-2 and Sk-3 drives  
37 rely on two separate genes, encoding separate proteins to enact killing and resistance functions [11].  
38 On the other hand, in some drive systems such as the *wtf* genes in *S. pombe* the killing and  
39 resistance functions are encoded by two separate proteins translated from alternative transcripts of  
40 the same gene [6, 7]. In the case of the Spok proteins in *P. anserina* only one transcript has been  
41 detected and it is not known how this single transcript can lead to both killing and resistance [12].

1 For the most part the cellular processes or structures targeted by the killing activity of spore killers is  
2 unknown. One exception is the *Het-s* locus (reviewed by [1]). Two alleles have been identified at this  
3 locus, *het-S* and *het-s*, encoding the proteins HET-S and HET-s respectively. Killing is enacted via  
4 interaction between these two proteins which induces a conformation change in the HET-S protein  
5 exposing a previously buried transmembrane domain. The altered HET-S protein perforates cells  
6 membranes killing the cell [13].

7 As with most other spore killers, the mechanism by which Spok proteins kill the developing gametes  
8 which did not inherit it is currently unknown. Bioinformatic analysis suggests that Spok proteins  
9 consists of three domains [12]. Experimental evidence suggests that the second domain, a putative  
10 nuclease, is required for killing activity and the third domain, a putative kinase is required for  
11 resistance. Specifically, a mutation (D667) within the third domain of Spok3 results in an allele which  
12 could not be transformed into *P. anserina*, suggesting that it was toxic even in vegetative tissue [12].  
13 On the other hand, another mutation (K240) within the predicted catalytic core of the putative  
14 nuclease domain was found to abolish killing activity but not resistance [12]. Vogan *et al.*  
15 conjectured that a possible mode of action for the nuclease domain was the synthesis of a toxic  
16 diffusible metabolite [12].

17 A key difficulty in uncovering the mechanisms underlying spore killing is the limited availability of the  
18 relevant tissue (developing fungal asci). Indeed, in the case of *het-S* the mechanism was largely  
19 uncovered through examining its role in heterokaryon incompatibility, negating the need to examine  
20 developing asci. To overcome this issue, we sort to examine the activity of Spok1 in the  
21 experimentally amenable organism *Escherichia coli*. We here present evidence that the killing  
22 activity of Spok1<sup>D680A</sup> protein (equivalent to Spok3<sup>D667A</sup>) is indeed active in *E. coli*, furthermore that  
23 this activity is mediated via the disruption of the chromosomal DNA and use the eukaryotic system  
24 of *Saccharomyces cerevisiae* to infer a mechanism involving DNA damage. Given that the killing  
25 activity is known to depend on a domain with similarity to restriction endonucleases, we suggest  
26 that direct modification (for example cleavage) of the genomic DNA by the nuclease domain  
27 represents a likely mechanism.

28

## 29 **Methods**

### 30 **Strains used**

31 ***Escherichia coli* DH5 $\alpha$** : F<sup>-</sup> *endA1 glnV44 thi-1 recA1 relA1 gyrA96 deoR nupG purB20*  $\phi$ 80*lacZ* $\Delta$ M15  
32  $\Delta$ (*lacZYA-argF*)U169, *hsdR17*(*r<sub>K</sub><sup>-</sup>m<sub>K</sub><sup>+</sup>*),  $\lambda$ <sup>-</sup>. ***E. coli* Top10F'**: F'<sup>+</sup>[*lacI<sup>q</sup>Tn10*(Tet<sup>R</sup>)] *mcrA*  $\Delta$ (*mrr-hsdRMS-*  
33 *mcrBC*)  $\phi$ 80*lacZ* $\Delta$ M15  $\Delta$ *lacX74 recA1 araD139*  $\Delta$ (*ara-leu*)7697 *galU galK rpsL endA1 nupG*. **NEB turbo**  
34 **K-12** *glnV44 thi-1*  $\Delta$ (*lac-proAB*) *galE15 galK16 R(zgb-210::Tn10)*Tet<sup>S</sup> *endA1 fhuA2*  $\Delta$ (*mcrB-hsdSM*)5(*r<sub>K</sub><sup>-</sup>*  
35 *m<sub>K</sub><sup>-</sup>*) F'<sup>+</sup>[*traD36 proAB<sup>+</sup> lacI<sup>q</sup> lacZ* $\Delta$ M15]. ***Saccharomyces cerevisiae* BY4742**: MAT $\alpha$  *his3* $\Delta$ 1 *leu2* $\Delta$ 0  
36 *lys2* $\Delta$ 0 *ura3* $\Delta$ 0.

### 37 **Molecular cloning**

#### 38 ***E. coli* expression constructs**

39 Plasmids were generated to express Spok genes (PLAUB44 Spok1<sup>D680A</sup> or PLAUB51 Spok1<sup>WT</sup>) under  
40 the arabinose inducible P<sub>BAD</sub> promoter [14]. The *araC*-P<sub>BAD</sub> fragment was amplified from the genomic  
41 DNA of *E. coli* BL21(DE3) using primers AUB283 + AUB284. Two fragments of the yeast plasmid  
42 pYES2 backbone were amplified using primers AUB287 + DG1289; and primers DG1290 + AUB288.

1 Spok1<sup>WT</sup> was amplified using primers AUB285 + AUB286 and Spok1<sup>D680A</sup> was amplified in two  
2 fragments with AUB285 + AUB236 and AUB237 + AUB286. Oligonucleotide sequences are provided  
3 in Table S1. All PCR reactions were conducted using Q5 High-Fidelity 2X PCR Master Mix following  
4 the manufacturer's directions (New England Biolabs). These fragments were transformed into *S.*  
5 *cerevisiae* by heat shock using a standard lithium acetate method [15] and were combined into a  
6 single plasmid via homologous recombination in the yeast cells [16]. The plasmid was rescued into  
7 chemically competent *E. coli* using the Zymoprep Yeast Plasmid Miniprep Kit (Zymo Research).  
8 Competent cells were prepared using the Inoue method [17].

### 9 ***S. cerevisiae* expression construct**

10 Spok1 coding DNA was amplified from PLAUB44 (Spok1<sup>D680A</sup>) or PLAUB51 (Spok1<sup>WT</sup>) [10] using  
11 AUB516 + AUB517 and cloned into the HindIII site of pYES2 using the NEBuilder HiFi DNA Assembly  
12 Master Mix (New England Biolabs) following the manufacturer's directions. The primers were  
13 designed to include an optimal translation initiation site, including a synonymous C to T mutation in  
14 the second codon. This construct results in either Spok1<sup>WT</sup> or Spok1<sup>D680A</sup> expression under the  
15 galactose-inducible *GAL1* promoter of pYES2.

### 16 ***E. coli* assays**

17 *E. coli* containing the Spok1 plasmids were maintained on LB + carbenicillin + 0.2% glucose.

18 For induction of Spok1 expression the *E. coli* was first grown overnight in 5 ml LB + carbenicillin +  
19 glucose at 37°C with shaking. 50 µl of overnight culture was used to inoculate 50 ml of LB +  
20 carbenicillin in a 250 ml Erlenmeyer flask and allowed to grow for a further 4 h. At this point  
21 arabinose or glucose was added to 0.2% and incubation continued at 37°C either in the flask (for  
22 nucleic acid extraction) or diluted 1:1 with fresh LB media and incubated in a 96 well plate to acid  
23 monitor growth in a plate reader. Due to the faster growth rate of NEB Turbo cells this strain was  
24 diluted 1:10 rather than 1:1 with fresh LB. The plate reader assay was conducted in an EnVision  
25 Multimode Plate Reader with shaking (5 seconds, 900 rpm, 0.1 mm diameter, linear) every 10 min  
26 before reading OD at 595 nm.

27 To determine if Spok1<sup>D680A</sup> expression merely arrested cells growth for effected permanent killing  
28 attempted to "rescue" the strains at various timepoints after arabinose induction. This was done by  
29 pipetting 10 µl of induced culture into 1 ml of LB + glucose then plating out onto LB + glucose +  
30 carbenicillin agar plates.

### 31 **RNA sequencing**

32 *E. coli* strains containing plasmids PLAUB44 (Spok1<sup>D680A</sup>) or PLAUB51 (Spok1<sup>WT</sup>) were induced with  
33 arabinose as described above. RNA was extracted from 5 ml of *E. coli* culture at 45 min and 2 h 30  
34 min, after induction for RNA sequencing. Four replicates for each construct at each timepoint were  
35 analysed (16 samples total). *E. coli* cultures were pelleted by centrifugation and then lyophilised  
36 before DNA was extracted using TRIzol reagent following the manufacturer's instructions. The RNA  
37 was sequenced at the Australian Genome Research Facility. The libraries were prepared using the  
38 Illumina Stranded Total RNA Prep Ligation with Ribo-Zero Plus kit and sequenced on an Illumina  
39 NovaSeq 6000.

40 RNA sequence analysis was conducted using Galaxy [18]. Reads were mapped to the *E. coli*  
41 chromosome using STAR [19], reads mapping to each gene were counted using featureCount [20]  
42 and differentially expressed genes were determined using DEseq2 [21].



## 1 DNA sequencing data and qPCR

2 20 ml of *E. coli* cultures were pelleted by centrifugation and then lyophilised before DNA was  
3 extracted using the Qiagen Plant Mini Kit. DNA was further purified by an ethanol precipitation step  
4 followed by resuspension in pure water. DNA quality was confirmed by gel electrophoresis and a  
5 nanodrop spectrophotometer. DNA was extracted at 45 min, 2 h 30 min, 4 h 30 min (3 biological  
6 replicates each) post arabinose induction for *E. coli* transformed with PLAUB44 (Spok1<sup>D680A</sup>) or  
7 PLAUB51 (Spok1<sup>WT</sup>).

8 The fC/ter ratio was determined using a hydrolysis probe based duplex qPCR assay designed to  
9 conform with the MIQE guidelines [22]. Primers TTCGATCACCCCTGCGTACA and  
10 CGCAACAGCATGGCGATAAC amplified part of the *gidA* gene located close to the origin [23]. This  
11 product was detected using a FAM labelled probe AUB458 6-  
12 FAM/ATGAGTGAT/ZEN/ATAACACGGCACCTGCTGG/IBFQ (IDT). Primers AUB484 + AUB485 were used  
13 to amplify part of the *dcp* gene located near the terminus. This product was detected using a Cy5  
14 labelled probe Cy5/AACCCGCC/TAO/TGCTGCTTATCGATAAC/IBRQ (IDT). qPCR reactions were  
15 conducted using Luna Universal Probe qPCR mastermix (New England Biolabs). Reactions were set  
16 up in a total volume of 10 ml containing 0.4 µM of each probe, 0.2 µM of each primer and  
17 approximately 100 ng of template DNA. Reactions were run on a Bio Rad CFX384 qPCR machine  
18 (initial denaturation of 95°C for 10 minutes followed by 95°C 10 sec, 58°C 10 sec, 72°C 15 sec for 40  
19 cycles). The PCR efficacy was calculated using a 10-fold dilution series of DNA extracted from WT  
20 cells in late stationary phase (72 h). The oriC/ter of stationary phase cells is expected to be near 1  
21 ([24-26]). *gidA* was found to amplify at 98.3% efficiency and *dcp* at 97.4% efficiency. Given the  
22 similar PCR efficiency between the two targets we did not adjust calculations to account for reaction  
23 efficiency.

24 The effect of Spok1<sup>D680A</sup> expression on the *E. coli* chromosome was further explored via short-read  
25 whole-genome sequencing. DNA samples extracted from *E. coli* expressing Spok1<sup>WT</sup> and Spok1<sup>D680A</sup> 2  
26 h 30 min after induction were sequenced on a NovaSeq 6000 generating 150 bp paired end reads at  
27 the Victorian Clinical Genetics Services. The resultant reads were mapped to the *E. coli* chromosome  
28 using Bowtie 2 [27] in Galaxy, coverage across the chromosome was calculated from the resultant  
29 BAM file using bamCoverage [28] using 1 kb windows.

30

## 31 RAD51 deletion in *S. cerevisiae*

32 The *LEU2* selectable marker was amplified from plasmid pGAD-c1 [29] using primers AUB528 +  
33 AUB529. The resultant PCR product was used to delete the *RAD51* gene via homologous  
34 recombination in *S. cerevisiae* strain BY4742. Transformation was conducted using LiAc/PEG [15] and  
35 deletion of the gene was confirmed using primers AUB488 + AUB489, which amplify across the  
36 mutated region.

37

## 38 *S. cerevisiae* growth assay

39 To determine the effect of Spok1<sup>D680A</sup> expression in *S. cerevisiae* a spot assay on agar plates was  
40 employed. Strains carrying PLAUB90 (Spok1<sup>WT</sup>) or PLAUB91 (Spok1<sup>d680A</sup>) were streaked on SD without  
41 uracil with 2% glucose or galactose and grown for 48 h at 30°C. Colonies were picked into sterile  
42 water, serially diluted, and plated out onto SD without uracil with 2% glucose or galactose plates.

1

## 2 **RNR3 promoter GFP reporter strain**

3 GFP was introduced into the *S. cerevisiae* RNR3 locus. GFP was amplified from plasmid PLAUI7 [30]  
4 with primers AUB536 + AUB537 the LEU2 gene was amplified with primers AUB538 + AUB539 from  
5 plasmid pGAD-c1 [29]. Both products were simultaneously transformed into *S. cerevisiae* strain  
6 BY4742. Transformants were screened for hydroxyurea (HU) inducible GFP expression (SC with 50  
7 mM HU versus no HU). GFP expression was quantified using a Biotek Cytation 1 plate imager at 12 h  
8 hours post induction on a microscope slide. The fluorescence of individual cells was quantified using  
9 Image J software. Cell were pelleted via centrifugation and resuspended in water before  
10 examination to minimise background fluorescence.

11 The Spok1 plasmids were introduced into the RNR3-GFP strain and GFP fluorescence was measured  
12 following 12 h growth in SD without uracil with galactose.

13

## 14 **Results**

15

### 16 **A Spok1 allele carrying a mutated resistance domain (Spok1<sup>D680A</sup>) is toxic to *E. coli***

17 Inspired by the autoactive version of Spok3 being functional in vegetative cells of *P. anserina* [12] we  
18 reasoned that killing may target a conserved biological process and sought to identify a highly  
19 tractable system in which toxicity could be assessed. Such a system requires tightly regulable gene  
20 expression, which in *E. coli* can be achieved with the arabinose-inducible and glucose-repressible  
21 P<sub>BAD</sub> promoter [14]. A protein alignment revealed that the Spok3 residue D667 previously found to  
22 be essentially for resistance activity [12] corresponds to residue D680 in Spok1 (Figure 1A) and we  
23 created the equivalent mutated allele in Spok1 (hereafter termed Spok1<sup>D680A</sup>). When cloned under  
24 the control of the P<sub>BAD</sub> promoter, the wildtype and autoactive version of Spok1 grew similarly under  
25 repressive (high glucose) conditions. Expression of Spok1<sup>D680A</sup> caused *E. coli* growth to stop  
26 approximately 100 minutes after arabinose induction (Figure 1). In contrast cells expressing Spok1<sup>WT</sup>  
27 continue to grow. This effect was observed in two commonly used *E. coli* strains Top10F' (arabinose  
28 non utilising) and DH5α (arabinose utilising).

29 We next sought to determine if the expression of Spok1<sup>D680A</sup> was merely an inhibition of growth or  
30 indeed genuine killing. To this end we attempted to rescue arabinose induced cells by rapidly  
31 diluting them into high concentrations of glucose to suppress gene expression. This assay showed that  
32 the *E. coli* cells expressing Spok1<sup>D680A</sup> quickly lose viability after induction with an almost complete  
33 loss of viability after just 5 minutes in inductive conditions (Figure 1C).

34

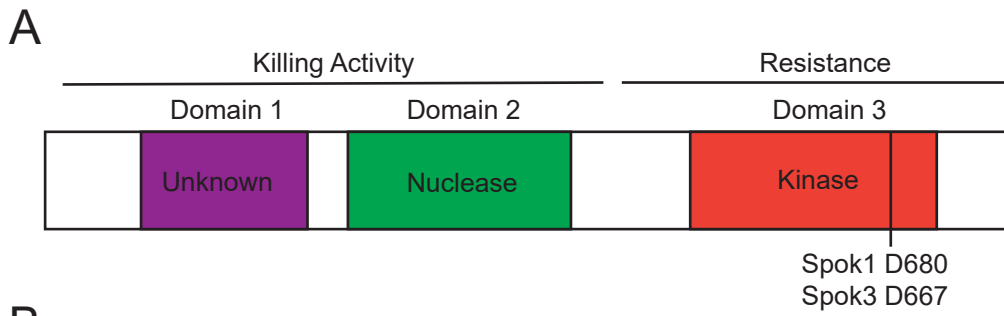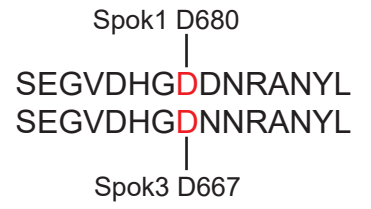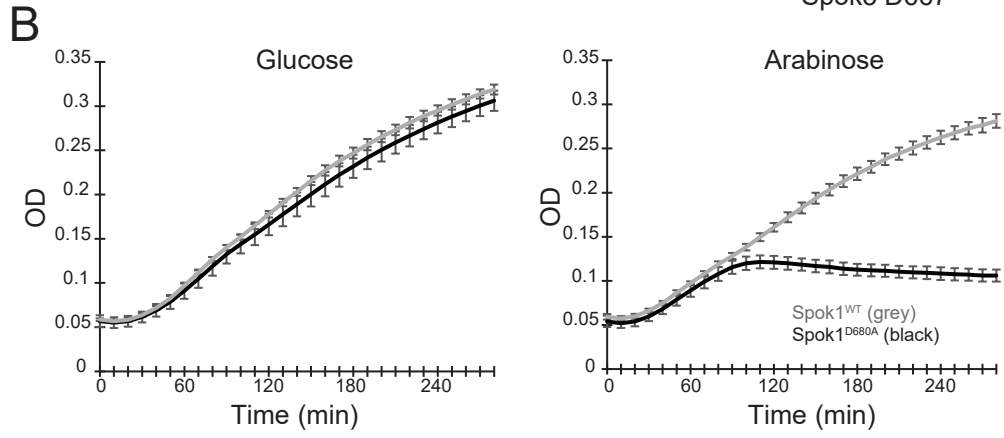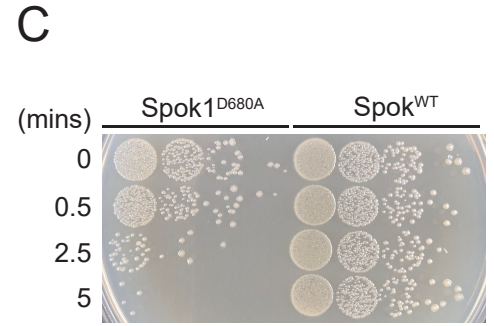

1 **Figure 1: A)** Representation of the domain structure of Spok proteins, according to [12]. The spore  
2 killing activity of the Spok proteins requires the nuclease (second) and possibly first domains. Host  
3 resistance is mediated by the third domain, a putative kinase. Experimental evidence suggests that  
4 mutation of aspartic acid (D) 667 to alanine (A) in Spok3 results is a toxic allele possessing only killing  
5 activity [12]. Protein alignments showed that this corresponds to residue D680 in Spok1. **B)** Growth  
6 curve of *E. coli* expressing Spok1<sup>WT</sup> and Spok1<sup>D680A</sup> after induction by arabinose. Error bars represent  
7  $\pm 1$  standard deviation. **C)** 10-fold dilution series of induced cells at various timepoints after  
8 induction passaged back onto high glucose concentrations and incubated for 24 hours to allow  
9 colonies to develop.

10

#### 11 **DNA metabolism genes are differentially regulated in response to Spok1<sup>D680A</sup> expression.**

12 To determine the mechanisms underlying the killing in *E. coli* we conducted RNA sequencing on  
13 induced *E. coli* expressing either Spok1 or Spok1<sup>D680A</sup>. Timepoints for RNA sequencing were chosen  
14 based on the OD curves rather than the rescue assay as OD readings are likely to better reflect the  
15 timing of physiological changes in the cell, even though the Spok1<sup>D680A</sup>-expressing cells were  
16 committed to death earlier. At an early timepoint (45 min), expression changes were relatively minor  
17 compared to the later timepoint (2 h 30 min) (Figure 2A). Only 47 genes showed statistically  
18 significant (at  $p < 0.05$ ) and greater than 2-fold change at 45 min compared to 1076 genes at 2 h 30  
19 min (Table S2).

20 Examination of the 47 genes showing altered regulation at 45 min revealed at least 8 genes involved  
21 in nucleotide metabolism including *nrdA*, *nrdB*, *nrdD*, *nrdG*, *yfaE*, *aegA*, *preA* and *preT*. Four of these  
22 genes (which were all upregulated in the Spok1<sup>D680A</sup> expressing strain) encode subunits of the two *E.*  
23 *coli* ribonucleotide reductases (RNR). RNRs convert ribonucleotides to deoxyribonucleotides which  
24 are essential for DNA synthesis. NrdA and NrdB form the aerobic RNR in *E. coli* and the neighbouring  
25 gene *yfaE* may play a role in the functioning of this enzyme [31]. NrdD and NrdG form the anaerobic  
26 RNR [32]. The down-regulated genes included genes required for the degradation of pyrimidines and  
27 purines. Namely PreA and PreT catalyse the reduction of uracil to 5,6-dihydrouracil in the  
28 breakdown of pyrimidine bases [33]. AegA is involved in the breakdown of purine nucleotides  
29 through the degradation of urate [34].

30 By the 2 h 30 min timepoint the extent of gene expression changes rendered the identification of  
31 individual genes impractical (Figure 2A). However, mapping gene expression along the chromosome  
32 revealed an upregulation in genes surrounding the origin of replication in the strain expressing  
33 Spok1<sup>D680A</sup> relative to the strain expressing Spok1<sup>WT</sup> (Figure 2B). This difference was present at 45 min  
34 but more pronounced at 2 h 30 min.

35

A

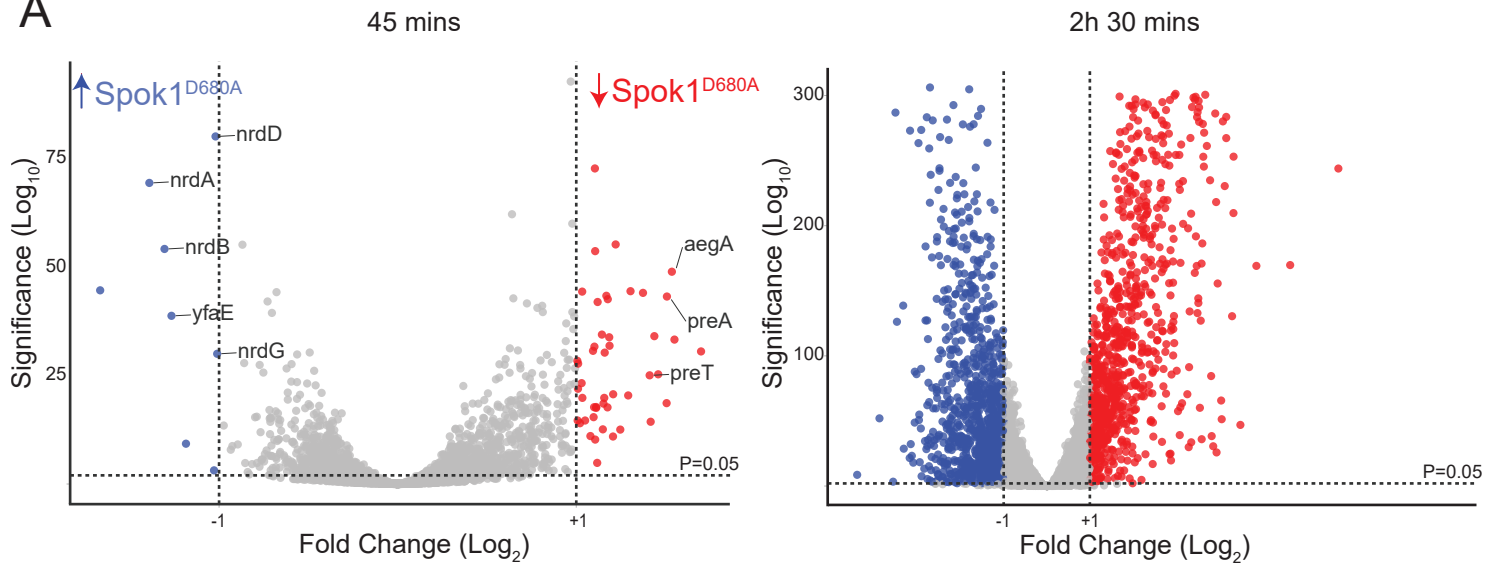

B

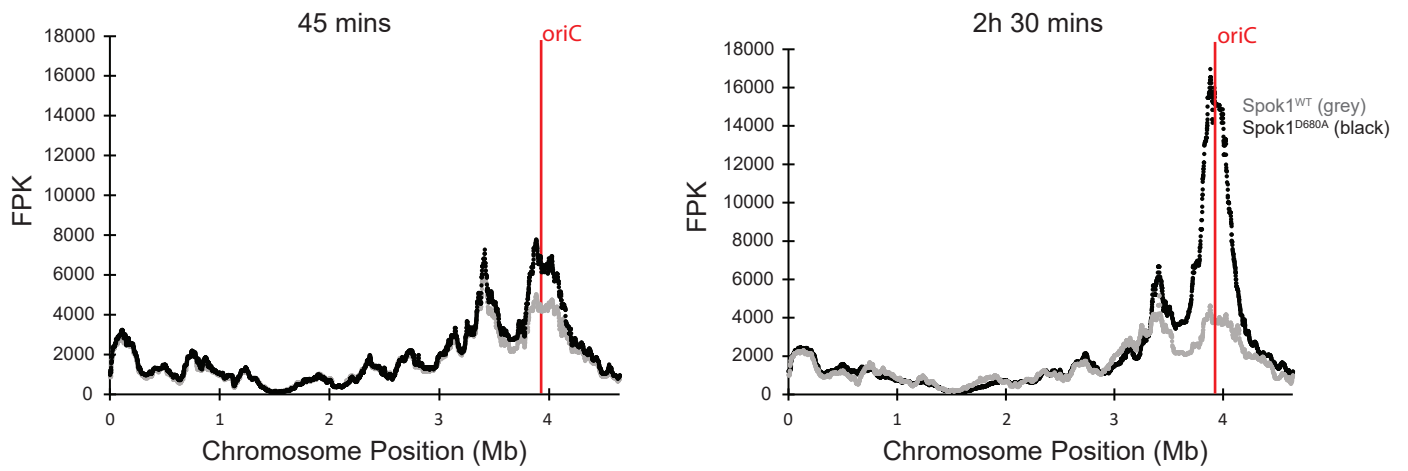

1 **Figure 2: A)** Volcano plots showing RNA seq data at 45 minutes and 2 hours 30 minutes. Blue genes  
2 are more highly expressed in *E. coli* expressing Spok1<sup>D680A</sup> and red genes are more highly expressed  
3 (greater than 2-fold change) in *E. coli* expressing Spok1<sup>WT</sup>. Specific genes involved in DNA  
4 metabolism that are differentially regulated at 45 min post induction are annotated. **B)** Median gene  
5 expression (100 gene windows) along the *E. coli* chromosome. Increased expression in genes  
6 proximal to the oriC in *E. coli* expressing Spok1<sup>D680A</sup> (compared to cells expressing Spok1<sup>WT</sup>) is  
7 observed at both 45 minutes and 2 hours 30 minutes but is more pronounced at the latter  
8 timepoint.

9 **Spok1<sup>D680A</sup> disrupts chromosome replication resulting in increased copy number proximal to the**  
10 **origin.**

11 DNA replication in *E. coli* proceeds bidirectionally from the origin of replication (oriC) to the terminus  
12 (ter) and new replication forks are initiated before previous rounds of DNA replication have  
13 completed, meaning that in actively growing cells there will be more copies of the DNA closer to the  
14 initiation of the DNA replication fork (Figure 3A) [35]. We hypothesised that apparent up-regulation  
15 of gene expression surrounding the origin of replication was a result of a corresponding increased  
16 DNA copy number in a gradient from the oriC to ter loci. We therefore determined the ratio of  
17 cellular DNA between the oriC and ter loci using quantitative PCR (Figure 3B). This revealed that  
18 induction of Spok1<sup>D680A</sup> resulted in an oriC/ter ratio of approximately 50:1 compared to  
19 approximately 2:1 in the strain expressing Spok1<sup>WT</sup>. The increase in DNA copy number surrounding  
20 the origin was confirmed by whole genome DNA sequencing (at 2 h 30 min) as this showed increased  
21 relative copy number in a region of approximately 1 million bases peaking at the origin of replication  
22 (Figure 3C).

23

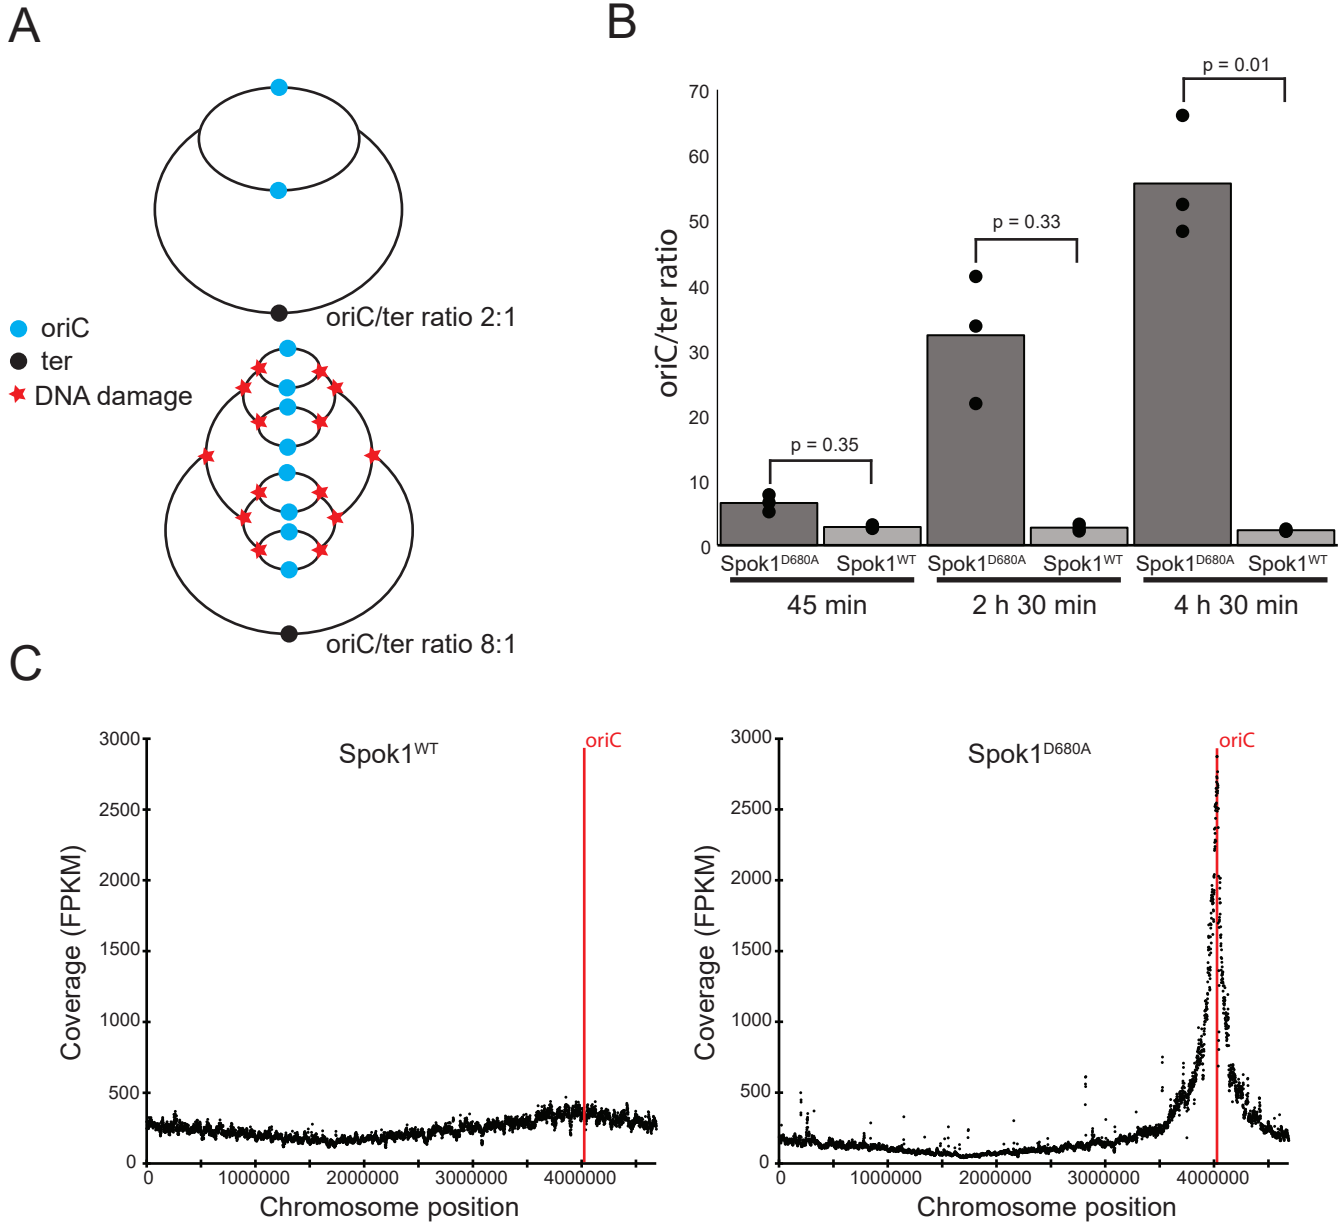



1 **Figure 3: A)** Diagram displaying the effect of DNA damage on oriC/ter ratio. If DNA damage prevents  
2 the replication form progressing fewer replication forks will reach the terminus of the chromosome.  
3 As replication forks continue to be initiated but fail to complete replication the ratio between oriC  
4 and ter DNA will increase. **B)** qPCR analysis of the oriC/ter ratio following induction of either Spok1<sup>WT</sup>  
5 or Spok1<sup>D680A</sup>. DNA sequencing read depth compared to chromosomal position at 2 h 30 min  
6 following induction of either Spok1<sup>WT</sup> or Spok1<sup>D680A</sup>. **C)** Read depth (FPKM) of Illumina DNA  
7 sequencing reads mapped to the *E. coli* chromosome, each point represents a 1kb genomic window.

### 8 **Spok1 also targets DNA to enact killing activity in a eukaryote**

9 While *E. coli* is a tractable system for analysing the mechanisms of the Spok proteins, there are  
10 fundamental differences in the cell biology between the fungi in which Spok genes are found and  
11 prokaryotes, not least the enveloped nucleus in eukaryotes in which the Spok proteins are thought  
12 to reside [3]. To understand if our identification of DNA as the target of Spok proteins also occurred  
13 in eukaryotes we utilised baker's yeast as it lacks endogenous copies of Spok genes but shares many  
14 fundamental aspects of eukaryote biology with filamentous ascomycetes. Indeed expression of  
15 Spok<sup>D680A</sup> in *S. cerevisiae* reduced growth rate (Fig 4C).

16 To determine if DNA was a target of Spok1 we sought to assay whether Spok1<sup>D680A</sup> was triggering  
17 DNA damage in yeast. To do this we made developed an RNR3:GFP strain to monitor expression of  
18 *RNR3* which is known to be responsive to DNA damage such as hydroxyurea as previously reported  
19 (data not shown, [36]). Induction of Spok1<sup>D680A</sup> in this reporter strain (Fig 4A and B) demonstrates  
20 upregulation of *RNR3* compared to expression of Spok1<sup>WT</sup> which presumably is in response to DNA  
21 damage.

22 Having established that DNA damage was most likely also occurring when Spok1<sup>D680A</sup> was expressed,  
23 we hypothesised that mutants impaired in their ability to repair DNA damage would show  
24 hypersensitivity to Spok1<sup>D680A</sup> expression. Rad51 deletion mutants show increased sensitivity to DNA  
25 damaging agents with Rad51 acting as a DNA recombinase in pathways for repairing DNA damage  
26 [37]. As expected, the *rad51Δ* mutant to showed hypersensitivity to Spok1<sup>D680A</sup> expression (Fig 4C).

27

A

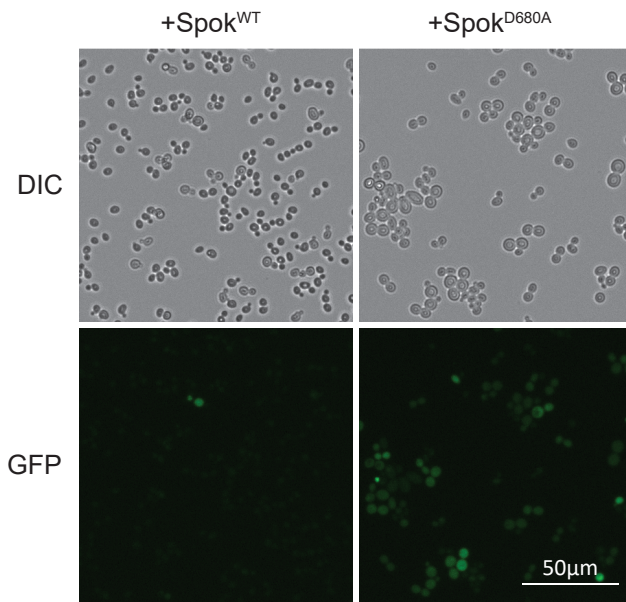

B

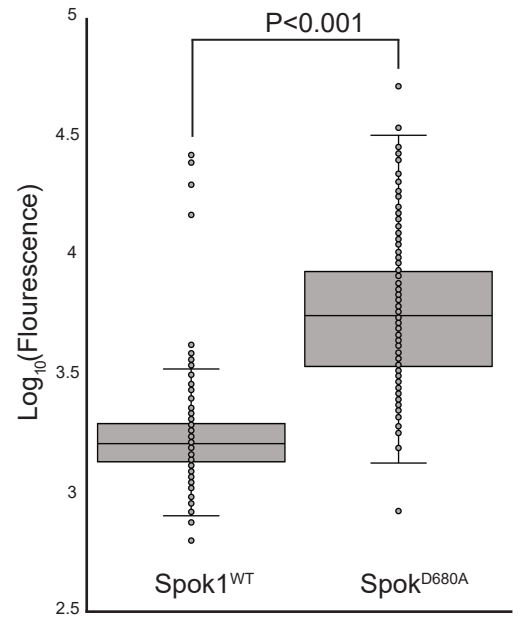

C

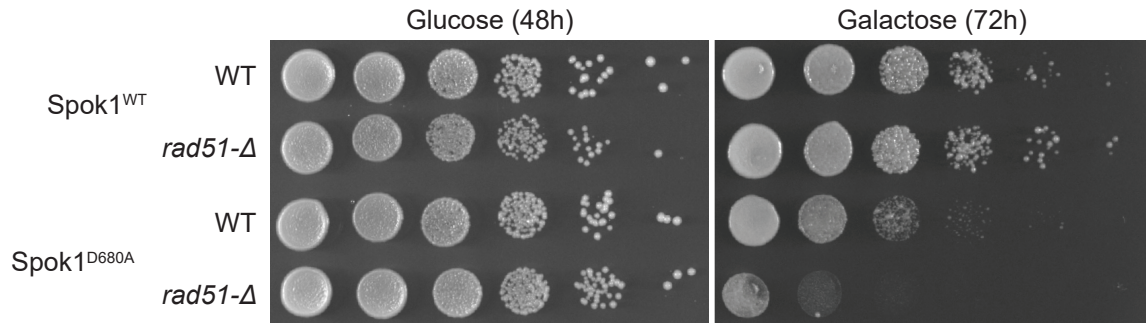

1 **Figure 4: A and B)** Expression of Spok1<sup>D680A</sup> in a DNA damage responsive RNR3:GFP reporter strain  
2 induced expression of GFP. Data points represent fluorescence intensity of individual cells (n= 256). **C)**  
3 Spot assay of *S. cerevisiae* WT and *rad51Δ* expressing Spok<sup>WT</sup> or Spok1<sup>D680A</sup> under a galactose  
4 inducible promoter. Cells were passage from glucose media onto either glucose or galactose media  
5 and the amount of growth following incubation at 30°C was observed. The *rad51Δ* mutant was  
6 hypersensitive to Spok1<sup>D680A</sup> expression.  
7

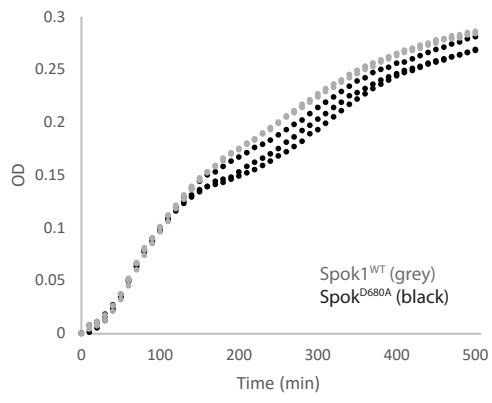

1 **Figure S1** Expression of Spok1<sup>WT</sup> in an *E. coli* RecA+ strain (NEB Turbo) resulted in less inhibition than  
2 in recA- strains (compare to Figure 1B in which growth ceased at approximately 100 minutes  
3 following induction of Spok1<sup>D680A</sup>).

#### 4 **Discussion**

5 The mechanisms underlying the gene drive mechanisms of fungal spore killers are poorly  
6 understood. We here provide several lines of evidence that the Spok1 protein of *Podospora* acts  
7 through DNA damage. Given the complexity of the relevant tissue (developing fungal ascus in the  
8 context of structural components of the perithecia) we employed heterologous model systems. We  
9 demonstrated that a mutated version of the Spok1 protein lacking resistance function (Spok1<sup>D680A</sup>)  
10 was toxic in the model organisms *E. coli* and *S. cerevisiae* (Figures 1B and 4A). These systems provide  
11 obvious experimental advantages over examining meiotic drive *in situ* during fungal crosses. Because  
12 the protein was functional in organisms as evolutionary distant as *E. coli* and yeast we hypothesised  
13 that Spok killing activity must target a highly conserved structure/pathway. Furthermore, the  
14 conservation of key residues between Spok1 and other Spok proteins, presumably the mode of  
15 action described here will be conserved in this gene family.

16 Firstly, we took a mechanism-neutral approach in *E. coli* and conducted RNA-sequencing on *E. coli*  
17 cultures induced to express Spok1<sup>D680A</sup>. At an early timepoint (45 min), several genes involved in DNA  
18 metabolism were differentially regulated (Figure 2A). These included several RNR subunits. *E. coli*  
19 RNR genes are known to be regulated in response to DNA damage [38]. Of note is that the RNA  
20 sequencing analysis was conducted in a *recA* mutant for improved plasmid stability. RecA is an  
21 important regulator of DNA repair pathways so many DNA-damage inducible genes will be  
22 unresponsive in this strain [39]. The altered regulation of genes involved in DNA metabolism at 45  
23 minutes post-induction provided initial evidence that DNA metabolism was the target of Spok1  
24 killing activity.

25 Examination of a later timepoint (2 h 30 min post induction) showed an unexpectedly strong  
26 expression of genes within a region of ~1Mbp centred around the origin of replication. Gene  
27 expression levels are known to correlate with chromosomal position in *E. coli* with highest  
28 expression closest to the origin [40]. However, in *E. coli* expressing Spok1<sup>D680A</sup> this effect was  
29 amplified (Figure 2B).

30 With evidence for specific DNA-metabolism related genes being regulated at the 45 min timepoint,  
31 we hypothesised that this effect might be due to an underlying perturbation in corresponding DNA  
32 copy number. The circular *E. coli* chromosome replicates bidirectionally from the origin to the  
33 terminator. Because new replication forks are initiated before previous replication forks have  
34 completed this results in a ratio of oriC/ter greater than one in actively dividing cells [25].  
35 Treatments which block the progression of the replicon e.g., hydroxyurea (which inhibits RNR and  
36 damages DNA) or antibiotics such as trimethoprim (which inhibit DNA synthesis) are known to  
37 increase the oriC/ter ratio [41, 42]. qPCR and whole-genome Illumina sequencing confirmed that the  
38 RNA-seq expression patterns were a result of DNA perturbations (Figure 3).

39 Given the evolutionary distance between bacteria and the eukaryotes in which Spok proteins occur  
40 natively, we decided to induce expression of Spok1<sup>D680A</sup> in the yeast *S. cerevisiae*. As in *E. coli*,  
41 expression of Spok1<sup>D680A</sup> protein proved toxic to the yeast cells. We took two different approaches  
42 to demonstrate that the killing of *S. cerevisiae* occurred through genotoxic stress. The first was to  
43 express Spok1<sup>D680A</sup> in an *S. cerevisiae* RNR3:GFP reporter strain. Rnr3 is a ribonucleotide reductase  
44 gene that is expressed in response to DNA damage [36]. Induction of Spok1<sup>D680A</sup> induced GFP

1 fluorescence in this strain (Figure 4A and B). Secondly, we expressed Spok1<sup>D680A</sup> in a *rad51Δ* mutant.  
2 This mutant is known to be deficient in DNA repair and was hypersensitive to Spok1<sup>D680A</sup> (Figure 4C).  
3 Conversely, a DNA repair proficient (*recA+*) *E. coli* strain proved more resistant to killing than the  
4 *recA-* cloning strains used elsewhere in this study (Supp Fig 1).

5 A limitation of this study is that we have not examined the activity of Spok1 *in situ* during fungal  
6 crosses to demonstrate the occurrence of DNA damage within a fungal ascus, as such an experiment  
7 is technically challenging. The D680A mutation behaves in the same way in both *E. coli* and *S.*  
8 *cerevisiae*, with evidence of DNA stress occurring in both species, suggests that the same mode of  
9 action will occur in the fungal ascus. The common response to Spok1<sup>D680A</sup> expression in these two  
10 distantly related species is consistent with a highly conserved molecular target such as genomic  
11 DNA.

12 The exact mechanism underlying the effect of Spok1<sup>D680A</sup> on DNA is still unclear. The killing activity of  
13 Spok1 proteins has previously been shown to require a catalytically active nuclease domain with  
14 similarity to type I restriction endonucleases [12]. Also consistent with DNA targeting, Grognet et al.  
15 showed that Spok proteins localise to the fungal nucleus in developing asci [3]. We thus suggest that  
16 the simplest mechanism for Spok1 killing, consistent with our data, the nuclear localisation and the  
17 domain content of the protein, would be cleavage (or other direct damage) of the chromosomal  
18 DNA by the nuclease domain of Spok1. Other toxins are known to work via enzymatic DNA damage  
19 for example Cytolethal distending toxin (CDT) produced by certain bacterial pathogens causes  
20 double-stranded DNA breaks in mammalian cells [43].

21 There are parallels to bacterial restriction modification (RM) systems which are known to behave as  
22 selfish elements [44]. They consist of a restriction enzyme and a methyltransferase that methylates  
23 the target site and thus protects the genome. However, if the selfish RM element is lost from the cell  
24 (e.g. if carried on an unstable plasmid) then the cell is killed (reviewed by [45]). This is curiously  
25 reminiscent of fungal gene drives in which spores not inheriting the drive element are killed.  
26 However, in the case of Spok proteins the resistance activity is encoded by a putative kinase domain  
27 of the same protein, not a separate methyltransferase enzyme, so the mechanism underlying  
28 resistance remains unclear. We envisage that the *E. coli* and *S. cerevisiae* models reported here will  
29 enable further studies into the activity of Spok proteins including how resistance is mediated.

## 30 **Data availability**

31 RNA and DNA sequencing reads are available under BioProject PRJNA798172.

## 32 **Acknowledgements**

33 ASU was supported by a CSIRO Early Research Career Postdoctoral Fellowship. DMG was supported  
34 by the Australian Research Council Research Hub for Sustainable Crop Protection (project number  
35 IH190100022) and by the Australian Government.

## 36 **References**

- 37 1. Zanders, S., and Johannesson, H. (2021). Molecular mechanisms and evolutionary  
38 consequences of spore killers in ascomycetes. *Microbiol Mol Biol Rev* *85*, e0001621.
- 39 2. Dalstra, H.J.P., Swart, K., Debets, A.J.M., Saupe, S.J., and Hoekstra, R.F. (2003). Sexual  
40 transmission of the [Het-s] prion leads to meiotic drive in *Podospora anserina*. *Proceedings*  
41 *of the National Academy of Sciences* *100*, 6616-6621.

- 1 3. Grognet, P., Lalucque, H., Malagnac, F., and Silar, P. (2014). Genes that bias mendelian  
2 segregation. *PLoS genetics* *10*, e1004387.
- 3 4. Svedberg, J., Vogan, A.A., Rhoades, N.A., Sarmarajeewa, D., Jacobson, D.J., Lascoux, M.,  
4 Hammond, T.M., and Johannesson, H. (2021). An introgressed gene causes meiotic drive in  
5 *Neurospora sitophila*. *Proceedings of the National Academy of Sciences* *118*, e2026605118.
- 6 5. Rhoades, N.A., Harvey, A.M., Samarajeewa, D.A., Svedberg, J., Yusuf, A., Abusharekh, A.,  
7 Manitchotpisit, P., Brown, D.W., Sharp, K.J., Rehard, D.G., et al. (2019). Identification of *rflk-*  
8 *1*, a meiotic driver undergoing RNA editing in *Neurospora*. *Genetics* *212*, 93-110.
- 9 6. Hu, W., Jiang, Z.D., Suo, F., Zheng, J.X., He, W.Z., and Du, L.L. (2017). A large gene family in  
10 fission yeast encodes spore killers that subvert Mendel's law. *eLife* *6*.
- 11 7. Nuckolls, N.L., Bravo Núñez, M.A., Eickbush, M.T., Young, J.M., Lange, J.J., Yu, J.S., Smith,  
12 G.R., Jaspersen, S.L., Malik, H.S., and Zanders, S.E. (2017). *wtf* genes are prolific dual poison-  
13 antidote meiotic drivers. *eLife* *6*.
- 14 8. Vogan, A.A., Ament-Velásquez, S.L., Bastiaans, E., Wallerman, O., Saupe, S.J., Suh, A., and  
15 Johannesson, H. (2021). The Enterprise, a massive transposon carrying Spok meiotic drive  
16 genes. *Genome Res.* *31*, 789-798.
- 17 9. Nolan, T. (2021). Control of malaria-transmitting mosquitoes using gene drives. *Philosophical*  
18 *Transactions of the Royal Society B: Biological Sciences* *376*, 20190803.
- 19 10. Gardiner, D.M., Rusu, A., Barrett, L., Hunter, G.C., and Kazan, K. (2020). Can natural gene  
20 drives be part of future fungal pathogen control strategies in plants? *New Phytologist* *228*,  
21 1431-1439.
- 22 11. Hammond, T.M., Rehard, D.G., Xiao, H., and Shiu, P.K.T. (2012). Molecular dissection of  
23 *Neurospora* spore killer meiotic drive elements. *Proceedings of the National Academy of*  
24 *Sciences* *109*, 12093-12098.
- 25 12. Vogan, A.A., Ament-Velásquez, S.L., Granger-Farbos, A., Svedberg, J., Bastiaans, E., Debets,  
26 A.J., Coustou, V., Yvanne, H., Clavé, C., Saupe, S.J., et al. (2019). Combinations of Spok genes  
27 create multiple meiotic drivers in *Podospora*. *eLife* *8*.
- 28 13. Seuring, C., Greenwald, J., Wasmer, C., Wepf, R., Saupe, S.J., Meier, B.H., and Riek, R. (2012).  
29 The mechanism of toxicity in HET-S/HET-s prion incompatibility. *PLoS Biology* *10*, e1001451.
- 30 14. Guzman, L.M., Belin, D., Carson, M.J., and Beckwith, J. (1995). Tight regulation, modulation,  
31 and high-level expression by vectors containing the arabinose P<sub>BAD</sub> promoter. *Journal of*  
32 *Bacteriology* *177*, 4121-4130.
- 33 15. Gietz, R.D., and Schiestl, R.H. (2007). High-efficiency yeast transformation using the LiAc/SS  
34 carrier DNA/PEG method. *Nat. Protoc.* *2*, 31-34.
- 35 16. Oldenburg, K. (1997). Recombination-mediated PCR-directed plasmid construction in vivo in  
36 yeast. *Nucleic Acids Research* *25*, 451-452.
- 37 17. Inoue, H., Nojima, H., and Okayama, H. (1990). High efficiency transformation of *Escherichia*  
38 *coli* with plasmids. *Gene* *96*.
- 39 18. Jalili, V., Afgan, E., Gu, Q., Clements, D., Blankenberg, D., Goecks, J., Taylor, J., and  
40 Nekrutenko, A. (2020). The Galaxy platform for accessible, reproducible and collaborative  
41 biomedical analyses: 2020 update. *Nucleic Acids Research* *48*, W395-W402.
- 42 19. Dobin, A., Davis, C.A., Schlesinger, F., Drenkow, J., Zaleski, C., Jha, S., Batut, P., Chaisson, M.,  
43 and Gingeras, T.R. (2013). STAR: ultrafast universal RNA-seq aligner. *Bioinformatics* *29*, 15-  
44 21.
- 45 20. Liao, Y., Smyth, G.K., and Shi, W. (2014). featureCounts: an efficient general purpose  
46 program for assigning sequence reads to genomic features. *Bioinformatics* *30*, 923-930.
- 47 21. Love, M.I., Huber, W., and Anders, S. (2014). Moderated estimation of fold change and  
48 dispersion for RNA-seq data with DESeq2. *Genome biology* *15*.
- 49 22. Bustin, S.A., Benes, V., Garson, J.A., Hellems, J., Huggett, J., Kubista, M., Mueller, R., Nolan,  
50 T., Pfaffl, M.W., Shipley, G.L., et al. (2009). The MIQE guidelines: Minimum information for  
51 publication of quantitative real-time PCR experiments. *Clinical Chemistry* *55*, 611-622.



- 1 23. Riber, L. (2006). Hda-mediated inactivation of the DnaA protein and *dnaA* gene  
2 autoregulation act in concert to ensure homeostatic maintenance of the *Escherichia coli*  
3 chromosome. *Genes & Development* *20*, 2121-2134.
- 4 24. Brochu, J., Vlachos-Breton, É., Sutherland, S., Martel, M., and Drolet, M. (2018).  
5 Topoisomerases I and III inhibit R-loop formation to prevent unregulated replication in the  
6 chromosomal Ter region of *Escherichia coli*. *PLoS genetics* *14*, e1007668.
- 7 25. Haugan, M.S., Charbon, G., Frimodt-Møller, N., and Løbner-Olesen, A. (2018). Chromosome  
8 replication as a measure of bacterial growth rate during *Escherichia coli* infection in the  
9 mouse peritonitis model. *Scientific Reports* *8*.
- 10 26. Simmons, L.A., Breier, A.M., Cozzarelli, N.R., and Kaguni, J.M. (2004). Hyperinitiation of DNA  
11 replication in *Escherichia coli* leads to replication fork collapse and inviability. *Molecular*  
12 *Microbiology* *51*, 349-358.
- 13 27. Langmead, B., and Salzberg, S.L. (2012). Fast gapped-read alignment with Bowtie 2. *Nature*  
14 *Methods* *9*, 357-359.
- 15 28. Ramírez, F., Ryan, D.P., Grüning, B., Bhardwaj, V., Kilpert, F., Richter, A.S., Heyne, S., Dündar,  
16 F., and Manke, T. (2016). deepTools2: a next generation web server for deep-sequencing  
17 data analysis. *Nucleic Acids Research* *44*, W160-W165.
- 18 29. James, P., Halladay, J., and Craig, E.A. (1996). Genomic libraries and a host strain designed  
19 for highly efficient two-hybrid selection in yeast. *Genetics* *144*, 1425-1436.
- 20 30. Idnurm, A., Urquhart, A.S., Vummadi, D.R., Chang, S., Van de Wouw, A.P., and López-Ruiz,  
21 F.J. (2017). Spontaneous and CRISPR/Cas9-induced mutation of the osmosensor histidine  
22 kinase of the canola pathogen *Leptosphaeria maculans*. *Fungal Biol. Biotechnol.* *4*, 12.
- 23 31. Wu, C.H., Jiang, W., Krebs, C., and Stubbe, J. (2007). YfaE, a ferredoxin involved in diferric-  
24 tyrosyl radical maintenance in *Escherichia coli* ribonucleotide reductase. *Biochemistry* *46*,  
25 11577-11588.
- 26 32. Garriga, X., Eliasson, R., Torrents, E., Jordan, A., Barbé, J., Gibert, I., and Reichard, P. (1996).  
27 *nrdD* and *nrdG* genes are essential for strict anaerobic growth of *Escherichia coli*.  
28 *Biochemical and Biophysical Research Communications* *229*, 189-192.
- 29 33. Hidese, R., Mihara, H., Kurihara, T., and Esaki, N. (2011). *Escherichia coli* dihydropyrimidine  
30 dehydrogenase Is a novel NAD-dependent heterotetramer essential for the production of  
31 5,6-dihydrouracil. *Journal of Bacteriology* *193*, 989-993.
- 32 34. Iwadate, Y., and Kato, J.I. (2019). Identification of a formate-dependent uric acid degradation  
33 pathway in *Escherichia coli*. *Journal of Bacteriology* *201*, e00573-00518.
- 34 35. Wang, J.D., and Levin, P.A. (2009). Metabolism, cell growth and the bacterial cell cycle.  
35 *Nature Reviews Microbiology* *7*, 822-827.
- 36 36. Suzuki, H., Sakabe, T., Hirose, Y., and Eki, T. (2017). Development and evaluation of yeast-  
37 based GFP and luciferase reporter assays for chemical-induced genotoxicity and oxidative  
38 damage. *Applied Microbiology and Biotechnology* *101*, 659-671.
- 39 37. Shinohara, A., Ogawa, H., and Ogawa, T. (1992). RAD51 protein involved in repair and  
40 recombination in *Saccharomyces cerevisiae* is a RecA-like protein. *Cell* *69*, 457-470.
- 41 38. Gibert, I., Calero, S., and Barbé, J. (1990). Measurement of in vivo expression of *nrdA* and  
42 *nrdB* genes of *Escherichia coli* by using *lacZ* gene fusions. *Molecular and General Genetics*  
43 *220*, 400-408.
- 44 39. Maslowska, K.H., Makiela-Dzbenka, K., and Fijalkowska, I.J. (2019). The SOS system: A  
45 complex and tightly regulated response to DNA damage. *Environmental and Molecular*  
46 *Mutagenesis* *60*, 368-384.
- 47 40. Sousa, C., De Lorenzo, V., and Cebolla, A. (1997). Modulation of gene expression through  
48 chromosomal positioning in *Escherichia coli*. *Microbiology* *143*, 2071-2078.
- 49 41. Odsbu, I., Morigen, and Skarstad, K. (2009). A reduction in ribonucleotide reductase activity  
50 slows down the chromosome replication fork but does not change its localization. *PLoS ONE*  
51 *4*, e7617.

- 1 42. Mahata, T., Molshanski-Mor, S., Goren, M.G., Jana, B., Kohen-Manor, M., Yosef, I., Avram,  
2 O., Pupko, T., Salomon, D., and Qimron, U. (2021). A phage mechanism for selective nicking  
3 of dUMP-containing DNA. *Proceedings of the National Academy of Sciences* *118*,  
4 e2026354118.
- 5 43. Jinadasa, R.N., Bloom, S.E., Weiss, R.S., and Duhamel, G.E. (2011). Cytolethal distending  
6 toxin: a conserved bacterial genotoxin that blocks cell cycle progression, leading to apoptosis  
7 of a broad range of mammalian cell lineages. *Microbiology* *157*, 1851-1875.
- 8 44. Naito, T., Kusano, K., and Kobayashi, I. (1995). Selfish behavior of restriction-modification  
9 systems. *Science* *267*, 897-899.
- 10 45. Kobayashi, I. (2001). Behavior of restriction-modification systems as selfish mobile elements  
11 and their impact on genome evolution. *Nucleic Acids Research* *29*, 3742-3756.

12 **Table S1:** Oligonucleotides designed in this study:

| Oligonucleotide | Sequence (5' to 3')                                              |
|-----------------|------------------------------------------------------------------|
| AUB283          | GCTTAATGGGGCGCTACAGTGCATAATGTGCCTGTCAAATGG                       |
| AUB284          | GGTATATCTCCTTCTTAAAGTTAAACAAAATTATTTCTAGAGCCAAAAAACGGGTATGGAG    |
| AUB285          | CTCTAGAAATAATTTTGTTTAACTTTAAGAAGGAGATATACCATGTCCGACAAAGACAGGATTG |
| AUB286          | CGATTCATTAATGCAGGGCCGCTGTCGTAACACCTTATAC                         |
| AUB287          | GTATAAGGTGTTACGACAGGCGGCCCTGCATTAATGAATCG                        |
| AUB288          | CCATTTGACAGGCACATTATGCACTGTAGCGCCCCATTAAGC                       |
| AUB236          | GATAATTGGCCCTATTGTCCGCCCATGATCAACACCCTCGC                        |
| AUB237          | GCGAGGGTGTGATCATGGGGCGGACAATAGGGCCAATTATC                        |
| DG1289          | AAAGGACAAGGACCTGAGCG                                             |
| DG1290          | ACTATACTAGATACTCCGTCTACTGT                                       |
| AUB516          | ACTCACTATAGGGAATATTAACAACAATGTCTGACAAAGACAGGATTGC                |
| AUB517          | TGGATCCGAGCTCGGTACCATCAAGTACGAATTTGGTGTCTCG                      |
| AUB484          | TTCGCGGTCCAGAATACACC                                             |
| AUB485          | CGAGCGATGAATTAGCCTCC                                             |
| AUB528          | GTAGTTATTTGTTAAAGGCCTACTAATTTGTTATCGTCATAACTGTGGGAATACTCAGG      |
| AUB529          | TAAACCTGTGTAATAAATAGAGACAAGAGACCAAACTTAAGCAAGGATTTTCTTAAC        |
| AUB488          | TACTAGTAGTTGAGTGTAGC                                             |
| AUB489          | AAAATGTACGGAACGCAACC                                             |
| AUB536          | AAGAATAGCAGCAGCAATAAATCAAATACTCCACACAAATGGTGAGCAAGGGCGAGGAG      |
| AUB537          | CATAAATCATAAGAAATTCGCTCACTTGTACAGCTCGTCCATG                      |
| AUB538          | CATGGACGAGCTGTACAAGTGAGCGAATTTCTTATGATTTATG                      |
| AUB539          | GTTAGATAAGGAAAGGGAAAAATGCCACCAGAAAGAAAATGTGGGAATACTCAGGTATC      |

13
